# Supplementary material for: Lipid pathway dysfunction is prevalent in patients with Parkinson’s disease
Source: PubMed Central journal article supplement — Brain. 2022 May 13;145(10):3472–87. doi: 10.1093/brain/awac176 (PMC9586542; doi:10.1093/brain/awac176), 2022-05-13
Supplement: awac176_supplementary_data.pdf [file awac176_supplementary_data.pdf]

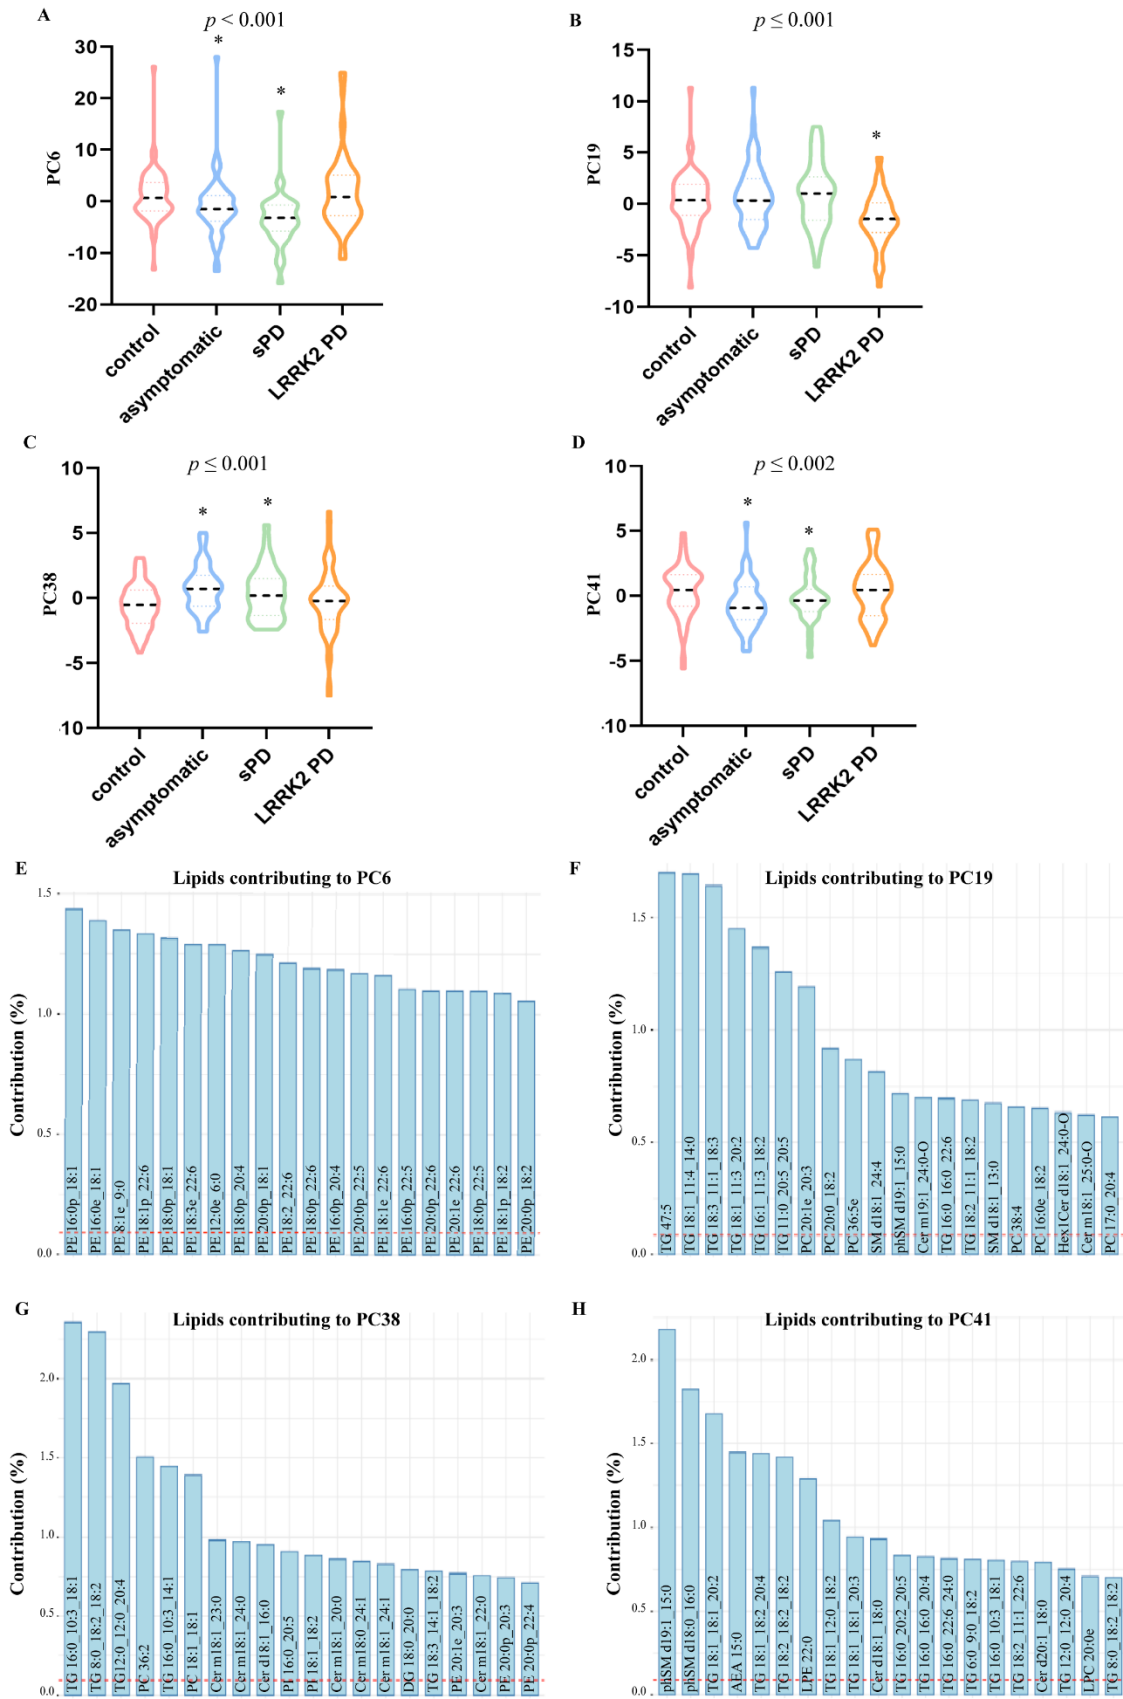

**Supplementary Figure 1 Serum lipid profiles from asymptomatic *LRRK2* mutation carriers, *LRRK2* PD and sporadic PD are different from controls.** To determine if lipid profiles were affected in serum from sub-groups of the multiethnic cohort (asymptomatic *LRRK2* mutation carriers, *LRRK2* PD and sporadic PD), linear discriminant analysis (LDA) on identified principal components was performed. (A) - (D) Two factor multivariate

analysis of variance covarying for age and sex identified four principal components, (A) PC6, (B) PC19, (C) PC38 and (D) PC41, which were significantly affected by an interaction between *LRRK2* and PD status. \*Significantly different to control. (E) - (H) The top twenty lipid species that contributed to the four principal components which significantly distinguished between groups. The dashed red line represents the expected value if the contribution of lipids were uniform.  $N = 221$ . *sPD* sporadic Parkinson's disease.

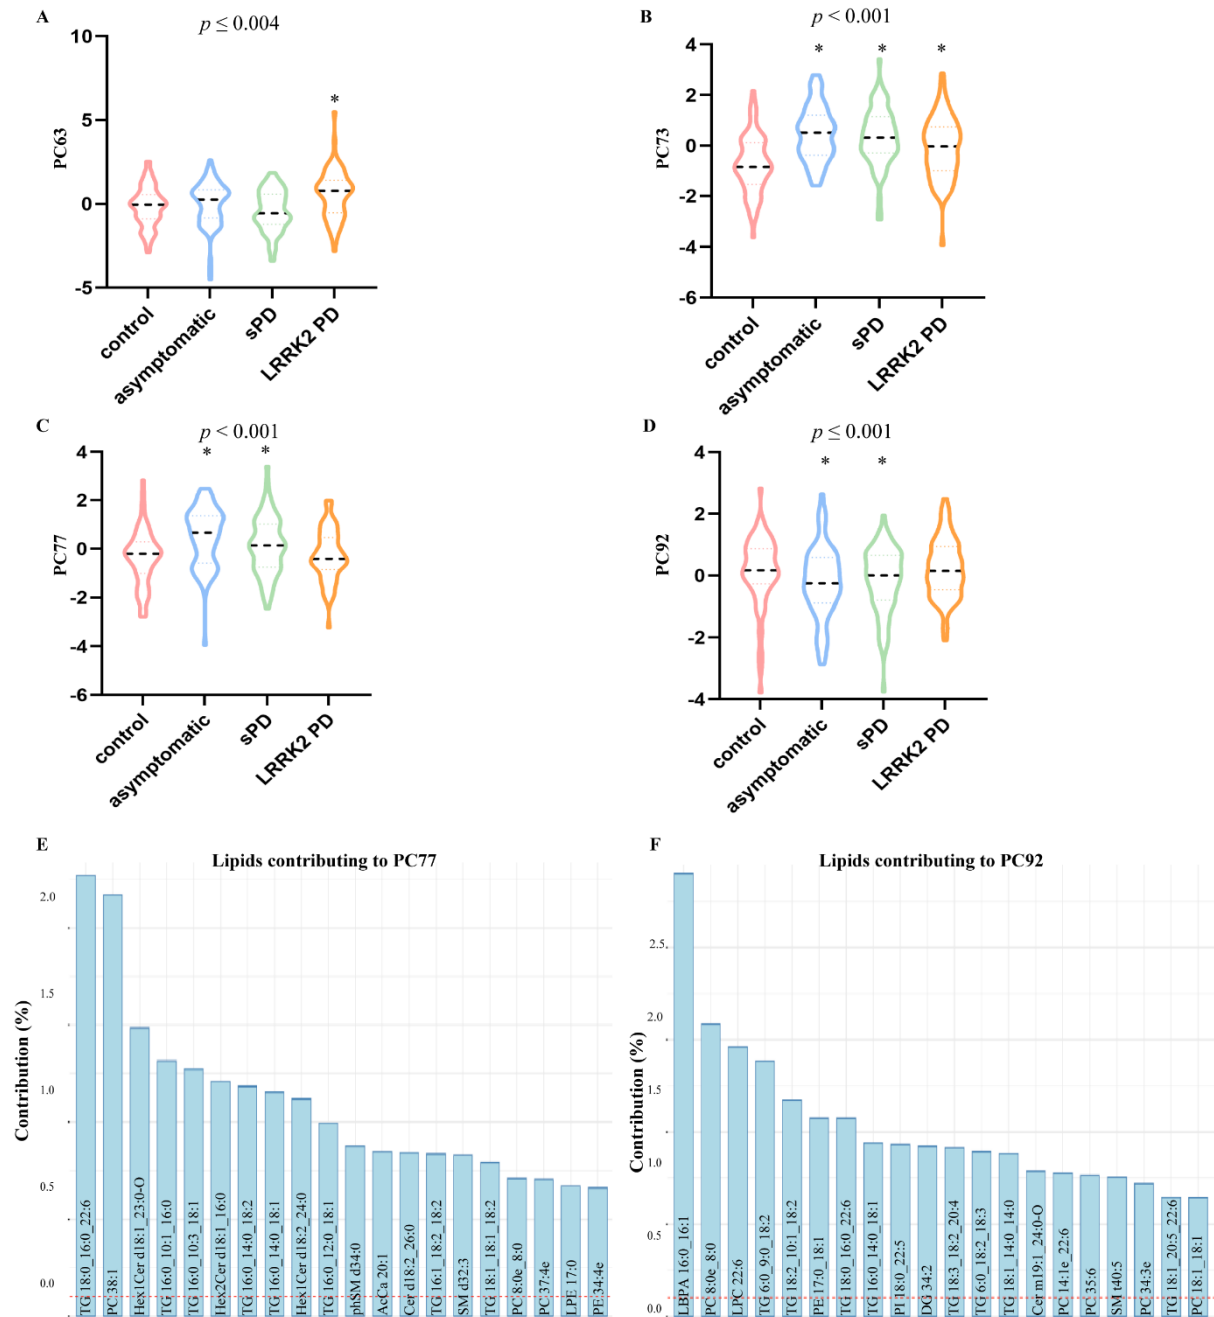

**Supplementary Figure 2 Serum lipid profiles from asymptomatic *LRRK2* mutation carriers, *LRRK2* PD and sporadic PD are different from controls in the *LRRK2* Ashkenazi Jewish Cohort.** To determine if lipid profiles were affected in serum from sub-groups of the Ashkenazi Jewish cohort (asymptomatic *LRRK2* mutation carriers, *LRRK2* PD and sporadic PD), linear discriminant analysis (LDA) on identified principal components was performed. (A) - (D) Two factor multivariate analysis of variance covarying for age and sex identified four principal components, (A) PC63, (B) PC73, (C) PC77 and (D) PC92, which were significantly affected by an interaction between *LRRK2* and PD status. \*Significantly different to control. (E) - (F) The top twenty lipid species that contributed to the four principal components which significantly distinguished between groups. The dashed red line represents the expected value if the contribution of lipids were uniform.  $N = 221$ . sPD sporadic Parkinson's disease.

Supplementary Table I Demographic data for the LRRK2 multiethnic cohort

|                           | Controls   | PD without LRRK2 G2019S | PD with LRRK2 G2019S | LRRK2 G2019S without PD |
|---------------------------|------------|-------------------------|----------------------|-------------------------|
| <b>N (serum)</b>          | 63         | 37                      | 65                   | 56                      |
| <b>Age</b>                | 57.5 ± 1.5 | 61.6 ± 2                | 61.4 ± 1.3           | 51.8 ± 1.9*             |
| <b>Sex (M/F)</b>          | 18/45      | 21/16#                  | 36/29#               | 23/33                   |
| <b>Age at diagnosis</b>   | -          | 54 ± 2                  | 51.6 ± 1.4           | -                       |
| <b>MoCA</b>               | 26.4 ± 0.4 | 26.1 ± 0.8              | 23.3 ± 0.6*          | 26.7 ± 0.4              |
| <b>UPDRS III</b>          | 0.5 ± 0.2  | 28.4 ± 1.6*             | 19.1 ± 1.5*          | 3.1 ± 0.9               |
| <b>Epworth Sleep</b>      | 6.7 ± 0.5  | 6.4 ± 0.6               | 8.9 ± 0.8*           | 6.4 ± 0.5               |
| <b>Depression</b>         | 2.6 ± 0.4  | 2.6 ± 0.4               | 4 ± 0.5*             | 2.5 ± 0.4               |
| <b>Daily Living</b>       | 99.1 ± 4.3 | 82.4 ± 2.6#             | 83.1 ± 1.7#          | 98 ± 1.2                |
| <b>SCOPA-AUT</b>          | 9.7 ± 1    | 14.9 ± 2.1#             | 15.5 ± 1.3#          | 9.9 ± 1                 |
| <b>REM sleep</b>          | 2 ± 0.3    | 4.2 ± 0.5*              | 2.5 ± 0.3            | 2 ± 0.3                 |
| <b>UPSIT</b>              | 31.2 ± 0.6 | 17.7 ± 1.5*             | 20.8 ± 0.9*          | 30.9 ± 0.9              |
| <b>BP meds (N/Y)</b>      | 54/8       | 26/10                   | 51/8                 | 45/5                    |
| <b>On aspirin (N/Y)</b>   | 58/2       | 25/2                    | 54/3                 | 41/2                    |
| <b>On ibuprofen (N/Y)</b> | 57/3       | 23/4                    | 57/0                 | 37/6                    |

A comparison of clinical variables across groups was assessed by one-way ANOVAs with least-significant difference post hoc. Chi-squared was performed for sex and Kruskal-Wallis followed by Mann-Whitney was performed for BP meds.

\* $p < 0.05$  compared to all other groups.

# $p < 0.05$  compared to controls.

Values are mean ± SEM. MoCA Montreal Cognitive Assessment, UPDRS III Unified Parkinson's Disease Rating Scale part 3, Depression Geriatric Depression Scale, Daily Living Schwab and England Activities of Daily Living Scale, SCOPA-AUT Scales for Outcomes in Parkinson's Disease - Autonomic dysfunction, UPSIT University of Pennsylvania Smell Identification Test. BP meds blood pressure medication.

**Supplementary Table 2 Demographic data for the LRRK2 Ashkenazi Jewish cohort**

|                         | <b>Controls</b> | <b>PD without LRRK2 G2019S</b> | <b>PD with LRRK2 G2019S</b> | <b>LRRK2 G2019S without PD</b> |
|-------------------------|-----------------|--------------------------------|-----------------------------|--------------------------------|
| <b>N</b>                | 77              | 79                             | 79                          | 80                             |
| <b>Age</b>              | 59.8 ± 1.9*     | 68 ± 1.1#                      | 69.4 ± 0.9#                 | 55.8 ± 1.4*                    |
| <b>Sex (M/F)</b>        | 33/44           | 55/24*                         | 39/40                       | 35/45                          |
| <b>Age at diagnosis</b> | -               | 58.1 ± 1                       | 57.3 ± 1.2                  | -                              |
| <b>MoCA</b>             | 26.7 ± 0.3      | 25.1 ± 0.6#                    | 25.1 ± 0.5#                 | 27.3 ± 0.4                     |
| <b>UPDRS III</b>        | 1.8 ± 0.3       | 24.8 ± 1.9*                    | 20.7 ± 1.6*                 | 2.2 ± 0.4                      |
| <b>Epworth Sleep</b>    | 5.7 ± 0.4       | 8.8 ± 0.7#                     | 8.5 ± 0.6#                  | 5.7 ± 0.6                      |
| <b>Depression</b>       | 2 ± 0.4         | 3.9 ± 0.5#                     | 4.4 ± 0.5#                  | 1.2 ± 0.2                      |
| <b>Daily Living</b>     | 98.9 ± 0.8      | 76.1 ± 3.1#                    | 77.2 ± 2.6#                 | 99.2 ± 0.6                     |
| <b>SCOPA-AUT</b>        | 13.5 ± 1.5      | 23.1 ± 1.6#                    | 22.2 ± 1.7#                 | 12.5 ± 1.4                     |
| <b>REM sleep</b>        | 2 ± 0.3         | 4.7 ± 0.5*                     | 3.2 ± 0.4*                  | 2.1 ± 0.4                      |
| <b>UPSIT</b>            | 31.8 ± 1        | 17.4 ± 1*                      | 23.3 ± 1.3*                 | 32.6 ± 1.5                     |

A comparison of clinical variables across groups was assessed by one-way ANOVAs with least-significant difference post hoc. Chi-squared was performed for sex. Values are mean ± SEM.

\*p < 0.05 compared to all other groups

#p < 0.05 compared to controls. MoCA Montreal Cognitive Assessment, UPDRS III Unified Parkinson's Disease Rating Scale part 3, Depression Geriatric Depression Scale, H & Y Hoehn & Yahr, Daily Living Schwab and England Activities of Daily Living Scale, SCOPA-AUT Scales for Outcomes in Parkinson's Disease - Autonomic dysfunction, UPSIT University of Pennsylvania Smell Identification Test.

**Supplementary Table 3 LRRK2 multiethnic cohort serum lipids**

| <b>Lipid name</b>                   | <b>Abbreviation</b> | <b>Number</b> |
|-------------------------------------|---------------------|---------------|
| <b>Glycerolipids</b>                |                     |               |
| Diacylglycerol                      | DG                  | 28            |
| Monogalactosyldiacylglycerol        | MGDG                | 2             |
| Triacylglycerol                     | TG                  | 474           |
| <b>Glycerophospholipids</b>         |                     |               |
| Cyclic phosphatidic acid            | cPA                 | 1             |
| Lysophosphatidic acid               | LPA                 | 1             |
| Lysophosphatidylcholine             | LPC                 | 44            |
| Lysophosphatidylethanolamine        | LPE                 | 15            |
| Phosphatidylcholine                 | PC                  | 190           |
| Phosphatidylethanolamine            | PE                  | 75            |
| Phosphatidylglycerol                | PG                  | 1             |
| Phosphatidylinositol                | PI                  | 19            |
| Phosphatidylserine                  | PS                  | 2             |
| <b>Sphingolipids</b>                |                     |               |
| Ceramide                            | Cer                 | 83            |
| Trihexosyl N-acetylhexosyl ceramide | CerG3GNAcI          | 1             |
| Ceramide phosphate                  | CerP                | 1             |
| Hexosylceramide                     | Hex1Cer             | 29            |
| Dihexosylceramide                   | Hex2Cer             | 10            |
| Trihexosylceramide                  | Hex3Cer             | 4             |
| Sphingomyelin                       | SM                  | 56            |
| Sphingomyelin(phytosphingosine)     | phSM                | 2             |
| Sulfatide                           | ST                  | 2             |
| <b>Sterol lipids</b>                |                     |               |
| Cholesterol ester                   | ChE                 | 13            |
| Acyl hexosyl cholesterol ester      | AcHexChE            | 1             |
| Campesterol ester                   | CmE                 | 3             |
| Sitosterol ester                    | SiE                 | 1             |
| <b>Fatty Acyls</b>                  |                     |               |
| Acyl carnitine                      | AcCa                | 35            |
| N-Acylethanolamine                  | AEA                 | 2             |
| Platelet-activating factor          | PAF                 | 18            |
| <b>Prenol lipids</b>                |                     |               |
| Coenzyme Q8                         | CoQ8                | 1             |
| Coenzyme Q9                         | CoQ9                | 1             |
| Coenzyme Q10                        | CoQ10               | 1             |

Lipids sub-classes and the number of individual species detected in serum from the LRRK2 multiethnic cohort (n = 221).

**Supplementary Table 4 Summary of canonical discriminant functions in the multiethnic cohort****Eigenvalues**

| Function | Eigenvalue | % of variance | Cumulative % | Canonical correlation |
|----------|------------|---------------|--------------|-----------------------|
| 1        | 12.602     | 41.8          | 41.8         | 0.963                 |
| 2        | 10.233     | 33.9          | 75.7         | 0.954                 |
| 3        | 7.326      | 24.3          | 100.0        | 0.938                 |

**Wilks' Lambda**

| Test of Function(s) | Wilks' Lambda | Chi-square | df  | Sig.                    |
|---------------------|---------------|------------|-----|-------------------------|
| 1 through to 3      | 0.001         | 1111.587   | 357 | 2.2 × 10 <sup>-78</sup> |
| 2 through to 3      | 0.011         | 705.700    | 236 | 2.5 × 10 <sup>-48</sup> |
| 3                   | 0.120         | 329.563    | 117 | 4.0 × 10 <sup>-22</sup> |

Serum lipid profiles from Parkinson's disease patients, *LRRK2* mutation carriers and controls from the multiethnic cohort were transformed by principal component analysis. Using linear discriminant analysis (LDA) on these principal components, three canonical functions were generated that could significantly discriminate the groups.

**Supplementary Table 5 LRRK2 Ashkenazi Jewish cohort serum lipids**

| <b>Lipid name</b>                   | <b>Abbreviation</b> | <b>Number</b> |
|-------------------------------------|---------------------|---------------|
| <b>Glycerolipids</b>                |                     |               |
| Diacylglycerol                      | DG                  | 43            |
| Monogalactosyldiacylglycerol        | MGDG                | 2             |
| Triacylglycerol                     | TG                  | 247           |
| <b>Glycerophospholipids</b>         |                     |               |
| Bis(monoacylglycerol)phosphate      | BMP                 | 2             |
| Lysophosphatidylcholine             | LPC                 | 37            |
| Lysophosphatidylethanolamine        | LPE                 | 22            |
| Phosphatidic acid                   | PA                  | 1             |
| Phosphatidylcholine                 | PC                  | 207           |
| Phosphatidylethanolamine            | PE                  | 79            |
| Phosphatidylethanol                 | PEt                 | 2             |
| Phosphatidylglycerol                | PG                  | 18            |
| Phosphatidylinositol                | PI                  | 19            |
| Phosphatidylserine                  | PS                  | 13            |
| <b>Sphingolipids</b>                |                     |               |
| Ceramide                            | Cer                 | 52            |
| Dihexosyl N-acetylhexosyl ceramide  | CerG2GNAcI          | 1             |
| Trihexosyl N-acetylhexosyl ceramide | CerG3GNAcI          | 1             |
| Ceramide phosphoethanolamine        | CerPE               | 2             |
| Hexosylceramide                     | HexI Cer            | 29            |
| Dihexosylceramide                   | Hex2Cer             | 9             |
| Sphingomyelin                       | SM                  | 129           |
| Sphingomyelin(phytosphingosine)     | phSM                | 14            |
| <b>Sterol lipids</b>                |                     |               |
| Cholesterol ester                   | ChE                 | 15            |
| Acyl hexosyl cholesterol ester      | AcHexChE            | 3             |
| Acyl hexosyl stigmaterol ester      | AcHexStE            | 1             |
| Acyl hexosyl zymosterol ester       | AcHexZyE            | 1             |
| Campesterol ester                   | CmE                 | 4             |
| Zymosterol ester                    | ZyE                 | 2             |
| <b>Fatty Acyls</b>                  |                     |               |
| Acyl carnitine                      | AcCa                | 17            |
| Fatty acid                          | FA                  | 2             |
| O-Acyl-(gamma-hydroxy) fatty acid   | OAHFA               | 2             |
| <b>Prenol lipids</b>                |                     |               |
| Coenzyme Q8                         | CoQ8                | 1             |
| Coenzyme Q10                        | CoQ10               | 1             |

Lipid sub-classes and the number of individual species detected in serum from the LRRK2 Ashkenazi Jewish cohort (n = 315).



**Supplementary Table 6 Summary of canonical discriminant functions in the Ashkenazi Jewish cohort****Eigenvalues**

| Function | Eigenvalue | % of variance | Cumulative % | Canonical correlation |
|----------|------------|---------------|--------------|-----------------------|
| 1        | 4.112      | 47.3          | 47.3         | 0.897                 |
| 2        | 2.861      | 32.9          | 80.2         | 0.861                 |
| 3        | 1.723      | 19.8          | 100          | 0.795                 |

**Wilks' Lambda**

| Test of Function(s) | Wilks' Lambda | Chi-square | df  | Sig.                  |
|---------------------|---------------|------------|-----|-----------------------|
| 1 through to 3      | 0.019         | 1035.907   | 312 | $1.8 \times 10^{-78}$ |
| 2 through to 3      | 0.095         | 611.676    | 206 | $7.7 \times 10^{-42}$ |
| 3                   | 0.367         | 260.467    | 102 | $8.0 \times 10^{-16}$ |

To determine if lipid profiles could distinguish between groups in a second cohort, serum lipid profiles from Parkinson's disease patients, *LRRK2* mutation carriers and controls from the multiethnic cohort were transformed by principal component analysis. Using linear discriminant analysis (LDA) on these principal components, three canonical functions were generated that could significantly discriminate the groups.

**Supplementary Table 7 Demographic data for the CSF cohort**

|                                | <b>Controls</b> | <b>PD without LRRK2 G2019S</b> | <b>PD with LRRK2 G2019S</b> | <b>LRRK2 G2019S without PD</b> |
|--------------------------------|-----------------|--------------------------------|-----------------------------|--------------------------------|
| <b>n</b>                       | 20              | 29                             | 19                          | 20                             |
| <b>Age</b>                     | 53.5 ± 3.5      | 58.2 ± 2.2                     | 64.2 ± 2.9#                 | 52 ± 3                         |
| <b>Sex (M/F)</b>               | 10/10           | 19/10                          | 8/11                        | 11/9                           |
| <b>Age at diagnosis</b>        | -               | 52.4 ± 2.4                     | 55.2 ± 3.3                  | -                              |
| <b>MoCA</b>                    | 27.3 ± 0.5      | 26.9 ± 0.5                     | 23.7 ± 1*                   | 26.4 ± 0.5                     |
| <b>UPDRS III</b>               | 0.3 ± 0.3       | 27.1 ± 1.9#                    | 22.8 ± 3.5#                 | 3.1 ± 1.4*                     |
| <b>Epworth Sleep</b>           | 7.1 ± 0.7       | 5.4 ± 0.5                      | 6.9 ± 1.1                   | 5.4 ± 0.9                      |
| <b>Depression</b>              | 3.4 ± 1         | 2.1 ± 0.4                      | 3 ± 0.7                     | 1.9 ± 0.6                      |
| <b>Daily Living</b>            | 99.5 ± 0.5      | 87.1 ± 1.8*                    | 80 ± 4*                     | 99.5 ± 0.5                     |
| <b>SCOPA-AUT</b>               | 8.9 ± 1.7       | 10.5 ± 1.2                     | 14.1 ± 1.7#                 | 7.1 ± 1.4                      |
| <b>REM sleep</b>               | 1.9 ± 0.4       | 3.6 ± 0.6#                     | 1.8 ± 0.5                   | 2.2 ± 0.5                      |
| <b>UPSIT</b>                   | 33.6 ± 0.8      | 17.7 ± 1.6*                    | 22 ± 2*                     | 31 ± 0.8                       |
| <b>BP meds (N/Y)</b>           | 16/4            | 21/7                           | 18/1                        | 18/0                           |
| <b>On aspirin (N/Y)</b>        | 16/1            | 20/1                           | 15/0                        | 15/0                           |
| <b>Inflammatory meds (N/Y)</b> | 15/2            | 20/1                           | 15/0                        | 15/0                           |
| <b>On ibuprofen (N/Y)</b>      | 17/0            | 19/2                           | 15/0                        | 15/0                           |

A comparison of scale clinical variables across groups was assessed by one-way ANOVAs with least-significant difference post hoc. Chi-squared was performed for sex and Kruskal-Wallis followed by Mann-Whitney tests were performed for medication use. Values are mean ± SEM.

\*p < 0.05 compared to all groups.

#p < 0.05 compared to controls.

MoCA Montreal Cognitive Assessment, UPDRS III Unified Parkinson's Disease Rating Scale Part 3, Depression Geriatric Depression Scale, Daily Living Schwab and England Activities of Daily Living scale, SCOPA-AUT Scales for Outcomes in Parkinson's Disease - Autonomic dysfunction, UPSIT University of Pennsylvania Smell Identification Test. BP meds blood pressure medication. Inflammatory meds Regular use of other inflammatory medication.

**Supplementary Table 8 CSF cohort serum lipids**

| <b>Lipid name</b>              | <b>Abbreviation</b> | <b>Number</b> |
|--------------------------------|---------------------|---------------|
| <b>Glycerolipids</b>           |                     |               |
| Diacylglycerol                 | DG                  | 7             |
| Monoacylglycerol               | MG                  | 3             |
| Triacylglycerol                | TG                  | 76            |
| <b>Glycerophospholipids</b>    |                     |               |
| Bis(monoacylglycerol)phosphate | BMP                 | 1             |
| Lysophosphatidylcholine        | LPC                 | 2             |
| Phosphatidylcholine            | PC                  | 45            |
| Phosphatidylethanolamine       | PE                  | 11            |
| Phosphatidylglycerol           | PG                  | 2             |
| Phosphatidylinositol           | PI                  | 1             |
| <b>Sphingolipids</b>           |                     |               |
| Ceramide                       | Cer                 | 7             |
| Ceramide phosphate             | CerP                | 1             |
| Hexosylceramide                | Hex1Cer             | 5             |
| Sphingomyelin                  | SM                  | 20            |
| <b>Sterol lipids</b>           |                     |               |
| Cholesterol ester              | ChE                 | 2             |
| <b>Fatty Acyls</b>             |                     |               |
| N-Acylethanolamine             | AEA                 | 1             |
| <b>Prenol lipids</b>           |                     |               |
| Coenzyme Q10                   | CoQ10               | 1             |

Lipid sub-classes and individual species detected in cerebrospinal fluid from the LRRK2 multiethnic cohort (n = 88).

**Supplementary Table 9 Pathways altered in Parkinson's disease patients and LRRK2 mutation carrier CSF**

|                                                                                  | ID         | Lipids         |
|----------------------------------------------------------------------------------|------------|----------------|
| <b>Pathway altered in Parkinson's disease</b>                                    |            |                |
| Sphingolipid metabolism                                                          | [map00600] | CerP, HexI Cer |
| Glycogen production, GLUT4 translocation and glucose uptake (Insulin resistance) | [map04931] | DG, TG         |
| Oxidative phosphorylation and thermogenesis                                      | [map04714] | DG, TG         |
| Glycerolipid metabolism                                                          | [map00561] | DG, TG         |
| Regulation of lipolysis in adipocytes                                            | [map04923] | DG, TG         |
| Fat digestion and absorption                                                     | [map04975] | DG, TG         |
| <b>Pathways altered in LRRK2 G2019S mutation carriers</b>                        |            |                |
| Sphingolipid metabolism                                                          | [map00600] | Cer, HexI Cer  |
| Glycogen production, GLUT4 translocation and glucose uptake (Insulin resistance) | [map04931] | Cer, DG        |
| Adipocytokine signalling pathway                                                 | [map04920] | Cer, DG        |
| Sphingolipid signalling                                                          | [map04071] | Cer, DG        |
| Neurotrophin signalling pathway                                                  | [map04722] | Cer, DG        |
| Advanced glycation end products (AGE) signalling                                 | [map04933] | Cer, DG        |

Lipid sub-classes of interest from the CSF analyses were searched in the online KEGG compound/pathway database (Kanehisa et al., 2020) to identify whether lipids of interest were enriched in certain pathways. Pathways that were shared by at least two lipids are listed above. GLUT4 Glucose transporter type 4, insulin-responsive. Glycogen production, GLUT4 translocation and glucose uptake are sub-pathways in an "insulin resistance" pathway. Oxidative phosphorylation and thermogenesis is from "thermogenesis" pathway. \*Glucosylceramide and galactosylceramide were entered as the search terms for monohexoylceramide (HexI Cer) since the data obtained from LC-MS/MS does not allow these to be discriminated.

**Supplementary Table 10 Serum lipid directions of change**

|                    | Multiethnic             |                         | Ashkenazi Jewish       |                         | Multiethnic             |                        | Ashkenazi Jewish        |                         |
|--------------------|-------------------------|-------------------------|------------------------|-------------------------|-------------------------|------------------------|-------------------------|-------------------------|
|                    | <b>PC</b>               |                         | <b>PC</b>              |                         | <b>SM</b>               |                        | <b>SM</b>               |                         |
|                    | <b>G2019S</b>           | <b>PD</b>               | <b>G2019S</b>          | <b>PD</b>               | <b>G2019S</b>           | <b>PD</b>              | <b>G2019S</b>           | <b>PD</b>               |
| <b>P value</b>     | .0004                   | 2 x 10 <sup>-5</sup>    | 2.3 x 10 <sup>-5</sup> | 1.1 x 10 <sup>-10</sup> | 2.1 x 10 <sup>-11</sup> | 5.3 x 10 <sup>-8</sup> | 1.1 x 10 <sup>-32</sup> | 2.2 x 10 <sup>-12</sup> |
| <b>Lipids up</b>   | 6                       | 54                      | 5                      | 8                       | 1                       | 4                      | 0                       | 5                       |
| <b>Lipids down</b> | 10                      | 2                       | 14                     | 2                       | 8                       | 3                      | 9                       | 5                       |
|                    | <b>Cer</b>              |                         | <b>Cer</b>             |                         | <b>PE</b>               |                        | <b>PE</b>               |                         |
|                    | <b>G2019S</b>           | <b>PD</b>               | <b>G2019S</b>          | <b>PD</b>               | <b>G2019S</b>           | <b>PD</b>              | <b>G2019S</b>           | <b>PD</b>               |
| <b>P value</b>     | 2.9 x 10 <sup>-13</sup> | 6.1 x 10 <sup>-11</sup> | ns                     | 1 x 10 <sup>-5</sup>    | .021                    | 2 x 10 <sup>-5</sup>   | .002                    | 2.4 x 10 <sup>-8</sup>  |
| <b>Lipids up</b>   | 0                       | 1                       | -                      | 0                       | 3                       | 5                      | 6                       | 1                       |
| <b>Lipids down</b> | 17                      | 9                       | -                      | 9                       | 0                       | 2                      | 1                       | 5                       |
|                    | <b>LPE</b>              |                         | <b>LPE</b>             |                         | <b>AcCa</b>             |                        | <b>AcCa</b>             |                         |
|                    | <b>G2019S</b>           | <b>PD</b>               | <b>G2019S</b>          | <b>PD</b>               | <b>G2019S</b>           | <b>PD</b>              | <b>G2019S</b>           | <b>PD</b>               |
| <b>P value</b>     | ns                      | .008                    | ns                     | ns                      | ns                      | ns                     | ns                      | ns                      |
| <b>Lipids up</b>   | -                       | 0                       | -                      | -                       | -                       | -                      | -                       | -                       |
| <b>Lipids down</b> | -                       | 0                       | -                      | -                       | -                       | -                      | -                       | -                       |
|                    | <b>MGDG</b>             |                         | <b>MGDG</b>            |                         | <b>TG</b>               |                        | <b>TG</b>               |                         |
|                    | <b>G2019S</b>           | <b>PD</b>               | <b>G2019S</b>          | <b>PD</b>               | <b>G2019S</b>           | <b>PD</b>              | <b>G2019S</b>           | <b>PD</b>               |
| <b>P value</b>     | .01                     | 2 x 10 <sup>-6</sup>    | ns                     | ns                      | 1.5 x 10 <sup>-8</sup>  | 5 x 10 <sup>-6</sup>   | 3.1 x 10 <sup>-5</sup>  | 0.0009                  |
| <b>Lipids up</b>   | 1                       | 1                       | -                      | -                       | 6                       | 15                     | 5                       | 6                       |
| <b>Lipids down</b> | 0                       | 0                       | -                      | -                       | 106                     | 21                     | 11                      | 5                       |
|                    | <b>LPC</b>              |                         | <b>LPC</b>             |                         | <b>Hex1Cer</b>          |                        | <b>Hex1Cer</b>          |                         |
|                    | <b>G2019S</b>           | <b>PD</b>               | <b>G2019S</b>          | <b>PD</b>               | <b>G2019S</b>           | <b>PD</b>              | <b>G2019S</b>           | <b>PD</b>               |
| <b>P value</b>     | .032                    | 1 x 10 <sup>-6</sup>    | ns                     | ns                      | ns                      | 0.023                  | ns                      | 8.3 x 10 <sup>-7</sup>  |
| <b>Lipids up</b>   | 0                       | 9                       | -                      | -                       | -                       | 1                      | -                       | 2                       |
| <b>Lipids down</b> | 10                      | 0                       | -                      | -                       | -                       | 0                      | -                       | 0                       |
|                    | <b>DG</b>               |                         | <b>DG</b>              |                         |                         |                        |                         |                         |
|                    | <b>G2019S</b>           | <b>PD</b>               | <b>G2019S</b>          | <b>PD</b>               |                         |                        |                         |                         |
| <b>P value</b>     | ns                      | .004                    | ns                     | 0.004                   |                         |                        |                         |                         |
| <b>Lipids up</b>   | -                       | -                       | -                      | 2                       |                         |                        |                         |                         |
| <b>Lipids down</b> | -                       | 14                      | -                      | 0                       |                         |                        |                         |                         |

For both the Ashkenazi Jewish and multiethnic cohort serum, lipid sub-classes in Figure 6 were analysed via 2 factor multivariate analysis covarying for age and sex (and batch for the AJ cohort). P-value represents Wilks' Lambda from the multivariate analysis. A significant effect of either PD status or LRRK2 G2019S mutation status on each lipid sub-class are reported. Serum triacylglycerol (TG) and phosphatidylcholine (PC) analyses were performed grouped by carbon/double bond number (multiethnic: TG 31:0-TG 50:2, TG 50:2e-TG 56:6e and TG 56:7-TG 66:7, AJ: TG 29:0-TG 52:7 and TG 52:8 - TG 66:7; PC 16:0e-PC 37:6, PC 38:6-PC 48:2).
